# Supplementary material for: Development of Extraction Method for Determination of Saponins in Soybean-Based Yoghurt Alternatives: Effect of Sample pH
Source: MDPI journal article supplement (doi:10.3390/foods12112164), 2023-05-27
Supplement: s1 [file s1]

**Development of extraction method for determination of saponins in soybean-based yoghurt alternatives: effect of sample pH**

**Anastassia Bljahhina<sup>1,2</sup>, Maria Kuhtinskaja<sup>2</sup> and Tiina Kriščiunaite<sup>1\*</sup>**

<sup>1</sup>Center of Food and Fermentation Technologies (TFTAK), Mäealuse 2/4, 12618 Tallinn, Estonia

<sup>2</sup>Department of Chemistry and Biotechnology, Tallinn University of Technology, Akadeemia tee 15, 12618 Tallinn, Estonia

\*Corresponding: tiina@tftak.eu

**Table S1:** Nutritional information of analysed products.

| Sample code | Producer <sup>1</sup> | information                                                                                                                                                                                                                                                                                                                                                                                                                                                                                                                                                                                                                                                                                                         |
|-------------|-----------------------|---------------------------------------------------------------------------------------------------------------------------------------------------------------------------------------------------------------------------------------------------------------------------------------------------------------------------------------------------------------------------------------------------------------------------------------------------------------------------------------------------------------------------------------------------------------------------------------------------------------------------------------------------------------------------------------------------------------------|
| YA1         | A                     | <u>Ingredients:</u> Soya base (Water, Hulled soya beans (10.7%)), Sugar, Calcium (Tri-calcium citrate), Stabiliser (Pectins), Acidity regulators (Sodium citrates, Citric acid), Flavouring, Sea salt, Antioxidants (Tocopherol-rich extract, Fatty acid esters of ascorbic acid), Vitamins (B12, D2), Yogurt cultures (S. thermophilus, L. bulgaricus).<br><u>Nutritional values per 100 g:</u> Energy: 212 kJ / 51 kcal; Fat: 2.3 g; of which saturates: 0.4 g; mono-unsaturates: 0.5 g; polyunsaturates: 1.4 g; Carbohydrate: 2.1 g; of which sugars: 2.1 g; Fibre: 1 g; Protein: 4 g; Salt: 0.25 g; Vitamin D: 0.75 µg; Vitamin B12: 0.38 µg; Calcium: 120 mg                                                   |
| YA2         | B                     | <u>Ingredients:</u> Water, organic soy (11%), organic corn starch, salt, yogurt cultures<br><u>Nutritional values per 100 g:</u> Energy: 209 kJ / 50 kcal; Fat: 2,6 g; of which saturated fat: 0,4 g; Carbohydrate: 1,5 g; of which sugars: 0,4 g; Protein: 47 g; Salt: 0,07 g                                                                                                                                                                                                                                                                                                                                                                                                                                      |
| YA3         | C                     | <u>Ingredients:</u> Soy drink 76.5% (water, soybeans 8.7%), sugar, peaches (7.9%), water, maracuja (0.9%), modified starch, dextrose, calcium phosphate, thickener: pectin, citrus fiber, flavorings, acidity corrector: tartaric acid, vitamins: Riboflavin (B2), B12, D2, live cultures.<br><u>Nutritional values per 100 g:</u> Energy: 320 kJ, 76 kcal; Fat: 1.5 g; of which saturates: 0.2 g; mono-unsaturates: 0.2 g; polyunsaturates: 1.1 g; Carbohydrate: 12 g; of which sugars: 11 g; Fibre: 0.7 g; Protein: 3.2 g; Salt: 0.01 g; Vitamin B2: 0.21 mg; Vitamin B12: 0.38 µg; Vitamin D2: 1.5 µg; Calcium: 120 mg                                                                                           |
| YA4         | A                     | <u>Ingredients:</u> Soya base (Water, Hulled soya beans (9.7%)), Peach (10.9%), Sugar, Acidity regulators (Citric acid, Sodium citrates), Stabiliser (Pectins), Tri-calcium phosphate, Flavouring, Sea salt, Antioxidants (Tocopherol-rich extract, Fatty acid esters of ascorbic acid), Carrot extract, Vitamins (B2, B12, D2), Yogurt cultures (S. thermophilus, L. bulgaricus).<br><u>Nutritional values per 100 g:</u> Energy: 292 kJ / 69 kcal; Fat: 2.1 g; of which saturates 0.4 g; mono-unsaturates: 0.5 g; polyunsaturates: 1.2 g; Carbohydrate: 8.3 g; of which sugars: 8.2 g; Fibre: 0.9 g; Protein: 3.6 g; Salt: 0.25 g; Vitamin D: 0.75 µg; Vitamin B2: 0.21 mg; Vitamin B12: 0.38 µg; Calcium: 125 mg |
| YA5         | A                     | <u>Ingredients:</u> Soya base (Water, Hulled soya beans (15.7%)), Sugar, Stabiliser (Pectins), Calcium (Tri-calciumcitrate), Acidity regulators (Sodium citrates, Citric acid), Natural flavouring, Sea salt, Antioxidants (Tocopherol-rich extract, Fatty acid esters of ascorbic acid), Vitamins (B12, D2), Yogurt cultures (S. thermophilus, L. bulgaricus).<br><u>Nutritional values per 100 g:</u> Energy: 283 kJ / 68 kcal; Fat: 3.3 g; of which saturates: 0.6 g; mono-unsaturates: 0.7 g; polyunsaturates: 2 g; Carbohydrate: 2.6 g; of which sugars: 2.5 g; Fibre: 1.5 g; Protein: 5.8 g; Salt: 0.36 g; Vitamin D: 0.75 µg; Vitamin E: 1.3 mg; Vitamin B12: 0.38 µg; Calcium: 120 mg                       |
| SBD         | D                     | <u>Ingredients:</u> soya base 99% (water, soya beans 7,5%), calcium carbonate, stabiliser: gellan gum; acid regulator: potassium carbonat; vitamine: D, vitamine, natural flavouring, salt<br><u>Nutritional values per 100 ml:</u> Energy 144kJ / 35 kcal; Fat: 1.9 g of which saturates 0.3 g; Carbohydrate: 0.8 g of which sugars 0.7 g; Fibre: 0.5 g; Protein 3.3 g; salt 0.11 g; Calcium: 120 mg; vitamin D2 0.75 µg; vitamin B12 0.38 µg                                                                                                                                                                                                                                                                      |

<sup>1</sup> different letters mark different producers

**Table S2.** Repeatability of retention times (RTs), peak areas of soyasaponins and precision of the whole method

| analyte          | m/z    | RT<br>(min) | RT RSD (%)           |                       | Peak area<br>RSD (%) |                      | Precision <sup>1</sup><br>RSD (%) |                      |
|------------------|--------|-------------|----------------------|-----------------------|----------------------|----------------------|-----------------------------------|----------------------|
|                  |        |             | intra-day<br>(n = 6) | inter-day<br>(n = 18) | intra-day (n<br>= 6) | inter-day<br>(n = 3) | intra-day<br>(n = 6)              | inter-day<br>(n = 3) |
| Soyasaponin Bb   | 941.5  | 1.28        | 0.03                 | 0.7                   | 1.33                 | 1.1                  | 6                                 | 11                   |
| Soyasaponin Ba   | 957.3  | 1.32        | 0.70                 | 0.8                   | 1.73                 | 2.0                  | 5                                 | 12                   |
| Soyasaponin Aa   | 1364.3 | 1.30        | 0.16                 | 0.5                   | 0.96                 | 2.2                  | *                                 | *                    |
| Soyasaponin Ab   | 1435.6 | 1.28        | 0.37                 | 0.6                   | 0.19                 | 3.5                  | 4                                 | 12                   |
| Asperosaponin VI | 927.5  | 1.34        | 0.10                 | 1.5                   | 3.88                 | 3.0                  | -                                 | -                    |

<sup>1</sup> precision of the whole method
